# Supplementary material
Source: publisher figshare collection journal article supplement (https://sage.figshare.com/ndownloader/files/22018377)
Supplement: Supplementary file 1 [file 22018377]

**Supplementary Materials**

***Study 1 & 2 - Job Ad***

***
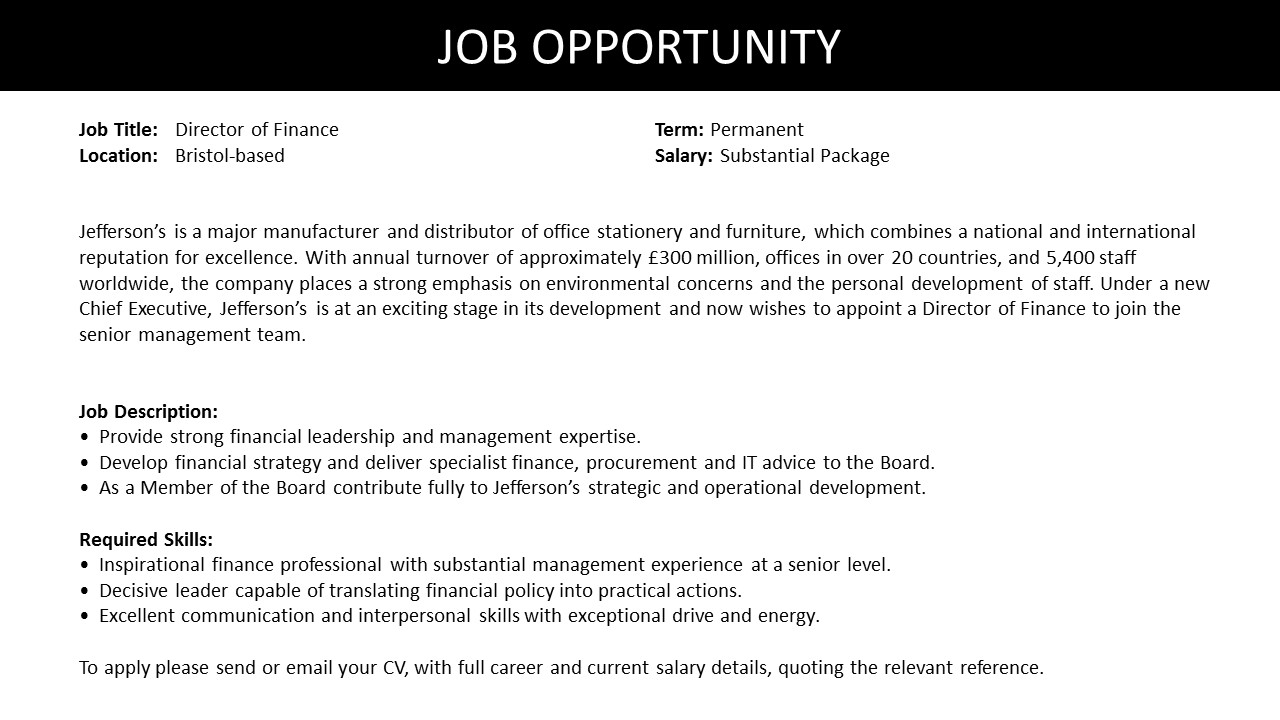
***

***Study 3 – Job Ad***

*Job Ad – high-status and ‘feminine’ type of job*

*Job Ad – high-status and ‘masculine’ type of job*

*Job Ad – low-status and ‘feminine’ type of job*

*Job Ad – low-status and ‘masculine’ type of job*
